# Supplementary material for: Trends and Outcomes in Lung Transplantation in Patients with and without Idiopathic Pulmonary Fibrosis in Spain during the Period 2016–2020
Source: MDPI journal article supplement (doi:10.3390/healthcare11111534), 2023-05-24
Supplement: s1 [file s1]

**Table S1.** ICD-10 codes using in this investigation.

| DIAGNOSIS                                             | ICD-10 Codes                                                                                       |
|-------------------------------------------------------|----------------------------------------------------------------------------------------------------|
| Single lung transplantation                           | 0BYCxxx, 0BYDxxx, 0BYFxxx, 0BYGxxx, 0BYHxxx, 0BYJxxx, 0BYKxxx 0BYLxxx                              |
| Bilateral lung transplantation                        | 0BYMxxx                                                                                            |
| COVID-19                                              | B34.2, B97.29, U07.1                                                                               |
| Pulmonary hypertension                                | I27.0, I27.2x, I27.89                                                                              |
| Haemodialysis                                         | 5A1Dxxx                                                                                            |
| Extracorporeal membrane oxygenation                   | 5A15xxx                                                                                            |
| Tracheostomy                                          | 0B11xxx                                                                                            |
| Lung transplant rejection                             | T86.810                                                                                            |
| Lung transplant failure                               | T86.811                                                                                            |
| Lung transplant infection                             | T86.812                                                                                            |
| Other or unspecified complications of lung transplant | T86.818, T86.819                                                                                   |
| Pneumonia                                             | J13-J18                                                                                            |
| Asthma                                                | J45                                                                                                |
| Current tobacco use                                   | Z72.0, F17.21x                                                                                     |
| Ventilator-associated pneumonia                       | J95.851                                                                                            |
| <i>Staphylococcus</i> bacteraemia                     | A4101, A4102, A411, A412, A4901, A4902, B9561, B9562, B957, B958                                   |
| Gram-negative bacteraemia                             | A413, A4150, A4151, A4152, A4153, A4159, B961, B9620, B9621, B9622, B9623, B9629, B963, B964, B965 |
| <i>Pseudomonas aeruginosa</i> infection               | B96.5                                                                                              |
| <i>Aspergillus</i> infection                          | B44.xx                                                                                             |
| Cytomegalovirus infection                             | B25.x                                                                                              |

**Table S2.** In hospital mortality according to study variables among patients with idiopathic pulmonary fibrosis (IPF) who underwent a lung transplantation in Spain from 2016 to 2020.

|                                           |             | 2016      | 2017      | 2018     | 2019      | 2020      | TOTAL     |
|-------------------------------------------|-------------|-----------|-----------|----------|-----------|-----------|-----------|
| Type, n (%)                               | Single      | 8(11.76)  | 12(14.12) | 4(7.84)  | 5(9.62)   | 8(22.86)  | 37(12.71) |
|                                           | Bilateral   | 5(17.86)  | 3(8.11)   | 3(6)     | 11(13.58) | 9(10.47)  | 31(10.99) |
| Sex, n(%)                                 | Men         | 6(8.45)   | 9(10)     | 5(6.67)  | 12(12.5)  | 15(15)    | 47(10.88) |
|                                           | Women       | 7(28)     | 6(18.75)  | 2(7.69)  | 4(10.81)  | 2(9.52)   | 21(14.89) |
| Age groups, n(%)                          | <45 years   | 2(18.18)  | 2(18.18)  | 1(16.67) | 1(8.33)   | 1(20)     | 7(15.56)  |
|                                           | 45-54 years | 3(21.43)  | 4(20)     | 1(6.25)  | 1(4.76)   | 4(23.53)  | 13(14.77) |
|                                           | 55-64 years | 8(15.38)  | 8(12.7)   | 3(5)     | 12(16.67) | 8(11.11)  | 39(12.23) |
|                                           | ≥ 65 years  | 0(0)      | 1(3.57)   | 2(10.53) | 2(7.14)   | 4(14.81)  | 9(7.44)   |
| CCI, n(%)                                 | 0           | 7(13.21)  | 5(9.09)   | 4(8.33)  | 6(9.84)   | 4(7.02)   | 26(9.49)  |
|                                           | ≥1          | 6(13.95)  | 10(14.93) | 3(5.66)  | 10(13.89) | 13(20.31) | 42(14.05) |
| Pulmonary hypertension, n(%) <sup>a</sup> | Yes         | 3(14.29)  | 5(17.24)  | 4(16)    | 6(31.58)  | 10(25)    | 28(20.9)  |
|                                           | No          | 10(13.33) | 10(10.75) | 3(3.95)  | 10(8.77)  | 7(8.64)   | 40(9.11)  |
| Any complication of lung transplant, n(%) | Yes         | 7(19.44)  | 10(17.24) | 4(6.25)  | 8(11.27)  | 11(17.46) | 40(13.7)  |
|                                           | No          | 6(10)     | 5(7.81)   | 3(8.11)  | 8(12.9)   | 6(10.34)  | 28(9.96)  |

CCI: Charlson comorbidity index.

<sup>a</sup>p value <0.05 when comparing total values between categories.

**Table S3.** Characteristics and in hospital mortality according to study variables among patients with idiopathic pulmonary fibrosis (IPF) who underwent a lung transplantation in Spain in years 2019 versus year 2020.

|                                           |             | Characteristics |             |         | IHM         |             |         |
|-------------------------------------------|-------------|-----------------|-------------|---------|-------------|-------------|---------|
|                                           |             | 2019            | 2020        | P value | 2019        | 2020        | P value |
| Number of procedures                      |             | 133             | 121         | 0.403   | 16(12.03)   | 17(14.05)   | 0.633   |
| Type, n (%)                               | Single      | 52(39.1)        | 35(28.93)   | 0.088   | 5(9.62)     | 8(22.86)    | 0.089   |
|                                           | Bilateral   | 81(60.9)        | 86(71.07)   |         | 11(13.58)   | 9(10.47)    | 0.535   |
| Sex, n(%)                                 | Men         | 96(72.18)       | 100(82.64)  | 0.047   | 12(12.5)    | 15(15)      | 0.612   |
|                                           | Women       | 37(27.82)       | 21(17.36)   |         | 4(10.81)    | 2(9.52)     | 0.877   |
| Age, mean (SD)                            |             | 58.21(9.24)     | 59.06(8.95) | 0.459   | 59.56(6.81) | 59.12(7.72) | 0.862   |
| Age groups, n(%)                          | <45 years   | 12(9.02)        | 5(4.13)     | 0.430   | 1(8.33)     | 1(20)       | 0.496   |
|                                           | 45-54 years | 21(15.79)       | 17(14.05)   |         | 1(4.76)     | 4(23.53)    | 0.089   |
|                                           | 55-64 years | 72(54.14)       | 72(59.5)    |         | 12(16.67)   | 8(11.11)    | 0.335   |
|                                           | ≥ 65 years  | 28(21.05)       | 27(22.31)   |         | 2(7.14)     | 4(14.81)    | 0.362   |
| CCI, mean (SD)                            |             | 0.81(0.96)      | 0.86(1.17)  | 0.756   | 1(1.1)      | 1.24(1.09)  | 0.541   |
| CCI, n(%)                                 | 0           | 61(45.86)       | 57(47.11)   | 0.843   | 6(9.84)     | 4(7.02)     | 0.583   |
|                                           | ≥1          | 72(54.14)       | 64(52.89)   |         | 10(13.89)   | 13(20.31)   | 0.319   |
| Pulmonary hypertension n(%)               | Yes         | 19(14.29)       | 40(33.06)   | <0.001  | 6(31.58)    | 10(25)      | 0.595   |
|                                           | No          | 114(85.71)      | 81(66.94)   |         | 10(8.77)    | 7(8.64)     | 0.975   |
| Any complication of lung transplant, n(%) | Yes         | 71(53.38)       | 63(52.07)   | 0.834   | 8(11.27)    | 11(17.46)   | 0.305   |
|                                           | No          | 62(46.62)       | 58(47.93)   |         | 8(12.9)     | 6(10.34)    | 0.663   |

CCI: Charlson comorbidity index.
